# Supplementary material
Source: Research Square preprint supplement (doi:10.21203/rs.3.rs-9065020/v1)
Supplement: Supplementary file 1 [file dd1516f7c8e9f7205eb5fc83.pdf]

Mr. Ezhilvaluthi .N,  
Community Officer,  
Tamil Nadu Urban Habitat Development Board,  
Coimbatore Division,  
Selvapuram,  
Coimbatore, Tamil Nadu - 641001  
Email ID : [ectnuhdb@gmail.com](mailto:ectnuhdb@gmail.com)  
Phone Number : 0422 234 3075

Date :

*To Whom It May Concern,*

**Subject : Letter of Support for Research**

I, Ezhhil Valudhi, in my capacity as Community Officer at Tamil Nadu Urban Habitat Development Board, hereby grant permission to Ms. Naveena Dheeraj, interning with the Tamil Nadu Urban Habitat Development Board (TNHUDB), to access our community for her research project.

Naveena's research project is aligned with our community development wing's interests and objectives, and we recognise the potential benefits it may bring to our community.

We understand that during the course of her research, Ms.Naveena may engage in activities such as interviews and observations within our community. We will support her efforts and encourage community members to cooperate with them as needed.

We believe that this research will contribute valuable insights and recommendations for the future projects of community development wing.

Please feel free to contact us if you have any queries or require further information regarding this matter.

Thank you for your attention to this request.



Regards,  
Mr. Ezhilvaluthi  
Community Officer  
Tamil Nadu Urban Habitat Development Board
